# Supplementary material
Source: HighWire-hosted journal article supplement (https://cmaj.ca/highwire/filestream/81736/field_highwire_adjunct_files/2/202392-res-3-at.pdf)
Supplement: 202392-res-3-at.pdf [file 202392-res-3-at.pdf]

### Supplementary Appendix 3: Propensity-Score Matched Analysis

A propensity-score matched analysis of our primary comparison was performed as an alternative method to adjust for confounding. We derived propensity scores for the likelihood of cannabis use with a logistic regression model that included all covariates from our primary model and survey-related parameters (PMID: 27460539, 23855598). A matched sample was created using nearest neighbour matching with no replacement and a caliper set at 0.2 times the standard deviation of the logit of the propensity scores, and matches retained their natural survey weights. (PMID: 27460539). The association between recent cannabis use and myocardial infarction was estimated with a weighted logistic regression model.

|                                                                                   | Before Matching                    |                          |               | After Matching                     |                         |               |
|-----------------------------------------------------------------------------------|------------------------------------|--------------------------|---------------|------------------------------------|-------------------------|---------------|
|                                                                                   | Mean Cannabis-User (n=4,610)       | Mean Non-User (n=28,563) | Std Mean Diff | Mean Cannabis-User (n=4,552)       | Mean Non-User (n=4,552) | Std Mean Diff |
| Distance                                                                          | 0.2922                             | 0.1142                   | 0.9357        | 0.2868                             | 0.2756                  | 0.0586        |
| Final Weight                                                                      | 702.8204                           | 535.954                  | 0.166         | 699.8897                           | 682.1504                | 0.0176        |
| Jurisdiction Legal Status: Medical Use                                            | 0.5388                             | 0.5928                   | -0.1082       | 0.542                              | 0.5444                  | -0.0048       |
| Jurisdiction Legal Status: Limited Medical Use                                    | 0.1954                             | 0.2535                   | -0.1463       | 0.1975                             | 0.2023                  | -0.0122       |
| Jurisdiction Legal Status: Full Legal Status                                      | 0.2657                             | 0.1537                   | 0.2535        | 0.2605                             | 0.2533                  | 0.0164        |
| Male Sex                                                                          | 0.6284                             | 0.4849                   | 0.297         | 0.6254                             | 0.6208                  | 0.0095        |
| Race: Black, non-Hispanic                                                         | 0.0939                             | 0.0796                   | 0.0489        | 0.094                              | 0.0945                  | -0.0015       |
| Race: Hispanic                                                                    | 0.1479                             | 0.1608                   | -0.0362       | 0.1478                             | 0.1454                  | 0.0068        |
| Race: Other, non-Hispanic                                                         | 0.0744                             | 0.0775                   | -0.012        | 0.0749                             | 0.078                   | -0.0117       |
| Race: Multiracial, non-Hispanic                                                   | 0.0423                             | 0.0251                   | 0.0853        | 0.0417                             | 0.0391                  | 0.0131        |
| Age: 25 to 34                                                                     | 0.4241                             | 0.3575                   | 0.1348        | 0.422                              | 0.4137                  | 0.0169        |
| Age: 35 to 44                                                                     | 0.3213                             | 0.4781                   | -0.3359       | 0.324                              | 0.3337                  | -0.0207       |
| BMI: Normal Weight                                                                | 0.4208                             | 0.3347                   | 0.1745        | 0.4185                             | 0.4071                  | 0.0231        |
| BMI: Overweight                                                                   | 0.3134                             | 0.3329                   | -0.0419       | 0.3146                             | 0.3137                  | 0.0019        |
| BMI: Obese                                                                        | 0.2388                             | 0.3151                   | -0.1789       | 0.2403                             | 0.254                   | -0.0319       |
| Education: Completed Highschool                                                   | 0.2985                             | 0.249                    | 0.1081        | 0.2981                             | 0.2996                  | -0.0034       |
| Education: Some College                                                           | 0.3245                             | 0.2883                   | 0.0773        | 0.3243                             | 0.3245                  | -0.0005       |
| Education: Completed College                                                      | 0.3028                             | 0.4025                   | -0.217        | 0.3034                             | 0.3056                  | -0.0048       |
| Income: \$15,000 to less than \$25,000                                            | 0.1868                             | 0.1458                   | 0.1051        | 0.1863                             | 0.1891                  | -0.0073       |
| Income: \$25,000 to less than \$35,000                                            | 0.118                              | 0.0976                   | 0.0633        | 0.1191                             | 0.1125                  | 0.0204        |
| Income: \$35,000 to less than \$50,000                                            | 0.1508                             | 0.1309                   | 0.0556        | 0.1505                             | 0.1538                  | -0.0092       |
| Income: \$50,000 or more                                                          | 0.4265                             | 0.5324                   | -0.2141       | 0.4264                             | 0.4328                  | -0.0129       |
| Marital status: Married                                                           | 0.2531                             | 0.4912                   | -0.5473       | 0.2555                             | 0.2641                  | -0.0197       |
| Marital status: Divorced                                                          | 0.0798                             | 0.0781                   | 0.0063        | 0.0806                             | 0.083                   | -0.0089       |
| Marital status: Widowed                                                           | 0.0061                             | 0.0062                   | -0.0011       | 0.0062                             | 0.0057                  | 0.0057        |
| Marital status: Separated                                                         | 0.0234                             | 0.0244                   | -0.0067       | 0.0235                             | 0.0242                  | -0.0044       |
| Active health coverage                                                            | 0.8098                             | 0.8729                   | -0.1608       | 0.8117                             | 0.824                   | -0.0313       |
| Smoking status: Current                                                           | 0.3839                             | 0.1532                   | 0.4744        | 0.3792                             | 0.373                   | 0.0126        |
| Smoking status: Former                                                            | 0.226                              | 0.1723                   | 0.1284        | 0.2261                             | 0.2195                  | 0.0158        |
| Current smokeless tobacco user                                                    | 0.0792                             | 0.0566                   | 0.0837        | 0.0793                             | 0.0813                  | -0.0073       |
| E-cigarette use status: Current                                                   | 0.1922                             | 0.0515                   | 0.3571        | 0.1883                             | 0.1777                  | 0.0268        |
| E-cigarette use status: Former                                                    | 0.5041                             | 0.2133                   | 0.5816        | 0.5042                             | 0.5081                  | -0.0079       |
| Heavy Drinker                                                                     | 0.187                              | 0.0592                   | 0.3277        | 0.1812                             | 0.1584                  | 0.0586        |
| Sedentary lifestyle                                                               | 0.1711                             | 0.199                    | -0.0739       | 0.1725                             | 0.1837                  | -0.0297       |
| Kidney disease                                                                    | 0.0128                             | 0.0121                   | 0.0061        | 0.0127                             | 0.0125                  | 0.002         |
| Diabetes                                                                          | 0.0269                             | 0.0342                   | -0.0449       | 0.027                              | 0.0272                  | -0.0014       |
| <b>Adjusted Odds Ratio for History of MI Between Cannabis-Users and Non-Users</b> | <b>2.07 (95% CI, 1.12 to 3.82)</b> |                          |               | <b>2.11 (95% CI, 1.12 to 3.97)</b> |                         |               |
